# Supplementary material for: An improved procedure for the preparation of 8-substituted guaninesElectronic supplementary information (ESI) available: characterisation of new compounds. See http://www.rsc.org/suppdata/cc/b3/b302529b/
Source: Royal Society of Chemistry journal article supplement (doi:10.1039/b302529b), 2003-01-01
Supplement: b302529b.doc [file b302529b.doc]

# Supplementary data

*6-Benzyloxy-2,4-diamino-5-nitrosopyrimidine* **(4)**

*R*f (CH2Cl2/MeOH 19/1) 0.13

m.p. 201°–204° (decomp.); lit.[1] (205°–212°).

1H-NMR (300 MHz, [D6]-DMSO): 10.06, 8.01(2H, 2*d*, *J* 4.2, NH2–C(4)); 7.89, 7.82 (2H, 2*s*, NH2–C(2)); 7.54–7.35 (5H, *m*, Ph); 5.57 (*s*, 2H, –OCH2).

13C-NMR (75 MHz, [D6]-DMSO): 170.2, 163.1, 150.6, 136.0 (4*s*, C(2), C(4), C(5) C(6)); 139.3 (*s*, Ph); 128.3, 128.25, 128.0 (3*d*, Ph); 67.8 (*t*, –OCH2).

*4*-N*-Acetyl-6-benzyloxy-2,4-diamino-5-nitrosopyrimidine* **(1a)**

m.p. 182–183°

*R*f (CH2Cl2/MeOH 9/1) 0.58

IR (neat): 3477*w*, 3316*w*, 3227*w*, 1740*w*, 1632*m*, 1591*m*, 1538*s*, 1480*w*, 1446*s*, 1396*m*, 1370*w*, 1344*m*, 1275*m*, 1234*s*, 1134*s*, 1076*s*, 1031*m*, 994*w*.

1H-NMR (300 MHz, [D6]–DMSO): 12.16 (1H, *s*, HN–C(4)); 8.72 (2H, *s*, NH2); 7.57–7.35 (5H, *m*, Ph); 5.63 (2H, *s*, OCH2); 2.48 (3H, *s*, CH3).

13C-NMR (75 MHz, [D6]–DMSO): 172.2 (*s*, C=O); 169.9, 163.2, 145.0, 135.5 (4*s*,pyrimidine); 138.5 (*s*, Ph); 128.35, 128.3, 128.1 (3*d*, Ph); 68.5 (*t*, OCH2); 27.3 (*q*, CH3).

ESI-MS: 310 (100, [M+Na]+), 288 (10, [M+H]+).

Anal. calc. for C13H13N5O3 (287.27): C 54.35, H 4.56, N 24.38; found: C 54.38, H 4.73, N 24.30.

*6-Benzyloxy-2,4-diamino-4*-N*-*iso*-butanoyl-5-nitrosopyrimidine* **(1b)**

*R*f (EtOAc) 0.48

IR (neat): 3482*w*, 3302*w*, 3197*w*, 2964*w*, 1739*w*, 1637*m*, 1600*m*, 1531*m*, 1495*m*, 1435*s*, 1396*m*, 1383*m*, 1349*s*, 1304*w*, 1274*m*, 1216*s*, 1142*s*, 1098*s*, 1056*m*, 1039*s*, 976*s*.

1H-NMR (300 MHz, CDCl3): 12.68 (1H, br. *s*, HN–C(4)); 7.54–7.34 (5H, *m*, Ph); 6.66, 5.89 (2H, 2*s*, br., NH2); 5.71 (2H, *s*, OCH2); 2.71 (1H, *hept*, *J* 6.9, C*H*(CH3)2); 1.28 (6H, *d*, *J* 6.9, CH3).

13C-NMR (75 MHz, CDCl3): 177.0 (*s*, C=O); 171.75, 164.3, 145.2, 135.2 (4*s*,pyrimidine); 139.2 (*s*, Ph); 128.6, 128.4, 128.2 (3*d*, Ph); 69.6 (*t*, OCH2); 38.1 (*d*, *C*H(CH3)2); 19.1 (*q*, CH3).

HR-MALDI: 338.1226 (100, C15H17N5NaO3, [M+Na]+ requires: 338.1229).

*6-Benzyloxy-2,4-diamino-5-nitroso-4*-N*-pivaloylpyrimidine* **(1c)**

m.p. 200–201°

*R*f (EtOAc) 0.48

IR (neat): 3487*w*, 3318*w*, 3228*w*, 2967*w*, 1724*m*, 1635*s*, 1605*s*, 1547*s*, 1497*m*, 1480*s*, 1438*s*, 1398*s*, 1369*m*, 1343*s*, 1308*m*, 1281*s*, 1205*s*, 1141*s*, 1078*m*, 1027*m*, 1001*m*, 976*m*.

1H-NMR (300 MHz, CDCl3): 12.90 (1H, *s*, HN–C(4)); 7.54–7.34 (5H, *m*, Ph); 5.90 (2H, *s*, NH2); 5.72 (2H, *s*, OCH2); 1.36 (9H, *s*, CH3).

13C-NMR (75 MHz, CDCl3): 178.7 (*s*, C=O); 171.6, 164.4, 145.7, 135.2 (4*s*,pyrimidine); 139.45 (*s*, Ph); 128.5, 128.4, 128.2 (3*d*, Ph); 69.55 (*t*, OCH2); 41.2 (s, *C*(CH3)3); 27.3 (*q*, C(*C*H3)3).

HR-MALDI: 352.1388 (100, C16H19N5NaO3, [M+Na]+ requires: 352.1386).

Anal. calc. for C16H19N5O3 (329.15): C 58.35, H 5.81, N 21.26; found: C 58.50, H 5.81, N 21.38.

*6-Benzyloxy-4*-N*-benzoyl-2,4-diamino-5-nitrosopyrimidine* **(1d)**

m.p. 200–201°

*R*f (CH2Cl2/MeOH 19/1) 0.56

IR (KBr): 3445*m*, 3315*m*, 3221*m*, 1718*s*, 1635*s*, 1600*s*, 1541*s*, 1500*s*, 1459*s*, 1394*m*, 1347*s*, 1283*s*, 1253*s*, 1177*s*, 1148*s*, 1083*m*, 1001*w*, 948*m*, 795*m*, 748*m*, 713*m*, 695*m*, 654*m*, 607*m*.

1H-NMR (300 MHz, [D6]–DMSO): 13.57 (1H, br. *s*, HN–C(4)); 8.89, 8.83 (2H, 2*s*, br. NH2); 7.99–7.65 (5H, *m*, PhCO); 7.58–7.39 (5H, *m*, *Ph*CH2); 5.65 (2H, *s*, OCH2).

13C-NMR (75 MHz, [D6]–DMSO): 170.3, 164.8, 164.5, 146.4, 135.7 (C=O, 5*s*,pyrimidine); 139.4 (*s*, Ph); 133.5, 133.2, 129.3, 128.7, 128.55, 128.4, 127.8 (*s*, 6*d*, Ph,); 68.6 (*t*, OCH2).

HR-MALDI: 372.1062 (54, C18H15N5NaO3, [M+Na]+ requires: 372.1073).

Anal. calc. for C18H15N5O3 (349.34): C 61.89, H 4.33, N 20.05; found: C 62.00, H 4.42, N 19.90.

*6-Benzyloxy-2,4-diamino-4*-N*-diphenylacetyl-5-nitrosopyrimidine* **(1e)**

m.p. 184–185°

*R*f (CH2Cl2/MeOH 19/1) 0.72

IR (KBr): 3385*m*, 3326*m*, 3232*m*, 1717*s*, 1652*s*, 1600*s*, 1523*s*, 1453*s*, 1411*s*, 1359*s*, 1253*s*, 1153*s*, 1077*m*, 1047*m*, 983*w*, 847*w*, 800*m*, 730*m*, 695*m*, 642*m*.

1H-NMR (300 MHz, [D6]–DMSO): 12.47 (1H, br. *s*, HN–C(4)); 8.77 (2H, br. *s*, NH2); 7.53–7.24 (15H, *m*, 3Ph); 6.04 (1H, *s*, C*H*Ph2); 5.59 (2H, *s*, OCH2).

13C-NMR (75 MHz, [D6]–DMSO): 173.15 (*s*, C=O); 170.5, 164.4, 146.45, 139.5 (4*s*,pyrimidine); 139.3, 136.3 (*s*, Ph); 129.7, 129.2, 129.0, 127.8 (*d*, Ph); 69.2 (*t*, OCH2); 59.3 (*d*, *C*HPh2).

HR-MALDI: 372.1062 (54, C18H15N5NaO3, [M+Na]+ requires: 372.1073).

Anal. calc. for C25H21N5O3 (439.47): C 68.33, H 4.82, N 15.94; found: C 68.34, H 5.02, N 15.82.

*6-Benzyloxy-2,4-diamino-5-nitroso-4*-N*-stearoylpyrimidine* **(1f)**

m.p. 118–119°

*R*f (CH2Cl2/MeOH 40/1) 0.27

IR (KBr): 3491*m*, 3371*w*, 3092*m*, 2921*s*, 2850*s*, 1711*m*, 1634*m*, 1583*s*,1552*s*, 1473*s*, 1447*m*, 1377*m*, 1327*s*, 1296*s*, 1182*s*, 1162*s*, 1140*s*, 1076*m*, 948*w*, 913*w*, 850*m*, 794*m*, 763*w*, 722*m*, 698*m*.

1H-NMR (300 MHz, [D6]–DMSO): 12.60 (*s*, NH–C(4)); 7.53–7.34 (5H, *m*, Ph); 6.75, 5.96 (2H, 2*s,* NH2); 5.70 (2H, *s*, OCH2); 2.54 (1H, *t*, *J* 7.5, H–C(1)); 1.72 (2H, *m*, H–C(2)); 1.33–1.17 (28H, *m*, 14CH2); 0.88 (3H, *t*, *J* 6.6, CH3).

13C-NMR (75 MHz, CDCl3): 173.3 (*s*, C=O); 171.7, 164.2, 154.6, 135.1(4*s*,pyrimidine); 139.0 (*s*, Ph); 128.5, 128.4, 128.1 (3*d*, Ph); 69.6 (*t*, OCH2); 39.3 (*t*, C(1)); 32.0 (*t*, C(2)); 29.8–22.8 (several *t*, C(3–16)); 14.2 (*q*, C(17)).

HR-MALDI: 534.3410 (12, C29H45N5NaO3, [M+Na]+ requires: 534.3415).

Anal. Calc. for C29H45N5O3 (511.71): C 68.07, H 8.86, N 13.69; found: C 68.04, H 8.93, N 13.72.

*6-benzyloxy-2,4-diamino-4*-N*-(2-furoyl)-5-nitrosopyrimidine* **(1g)**

m.p. 216–217° (decomp.)

*R*f (CH2Cl2/MeOH 40/1) 0.20

IR (KBr) 3479*m*, 3311*m*, 3220*m*, 1716*s*, 1636*s*, 1612*s*, 1577*s*, 1548*s*, 1459*s*, 1349*s*, 1297*s*, 1197*s*, 1164*m*, 1144*m*, 945*w*, 910*w*, 883*w*, 873*w*, 795*w*, 758*m*, 717*m*, 695*w*.

1H-NMR (300 MHz, [D6]–DMSO): 13.56 (1H, *s*, NH–C(4)); 8.88, 8.79 (2H, 2*s,* NH2); 8.15 (1H, *s*, H–C(5)); 7.57–7.40 (6H, *m*, Ph, H–C(3)); 6.80 (1H, *s*, H–C(4)); 5.64 (2H, *s*, OCH2).

13C NMR (75 MHz, [D6]–DMSO): 170.1, 155.0, 146.2, 135.4 (4*s*, pyrimidine); 163.9 (*s*, C=O); 154.8, 147.2, 117.6, 113.1 (furyl); 138.9 (*s*, Ph); 128.5, 128.3, 128.2 (3*d*, Ph); 68.6 (*t*, OCH2).

HR-MALDI: 340.1037 (69, C16H14N5O4, [M+H]+ requires: 340.1040).

Anal. Calc. for C16H13N5O4 (339.31): C 56.64, H 3.86, N 20.64; found: C 56.54, H 3.90, N 20.49.

*6-Benzyloxy-4*-N*-cinnamoyl-2,4-diamino-5-nitrosopyrimidine* **(1h)**

m.p. 184–185° (decomp.)

*R*f (CH2Cl2/MeOH 40/1) 0.23

IR (KBr) 3493*m*, 3306*m*, 3209*m*, 1715*m*, 1637*s*, 1623*s*, 1554*s*, 1450*s*, 1401*m*, 1347*s*, 1332*s*, 1287*w*, 1267*w*, 1212*s*, 1157*s*, 1062*w*, 975*w*, 910*w*, 863*w*, 770*w*, 748*w*, 716*w*, 695*w*.

1H-NMR (300 MHz, [D6]–DMSO): 12.49 (1H, *s*, NH–C(4)); 8.85, 8.76 (2H, 2*s,* NH2); 7.83–7.79, 7.57–7.37 (10H, *m*, Ph); 7.72, 7.63 (2H, 2*d*, *J* 15.9, CH=CH); 5.64 (2H, *s*, OCH2).

13C-NMR (75 MHz, D6–DMSO): 169.8, 163.3, 144.3, 130.6 (4*s*, pyrimidine); 165.75 (*s*, C=O); 138.5, 135.3 (2*s*, Ph); 133.75, 121.1 (2*d*, CH=CH); 128.8–127.8 (several *d*, Ph); 68.5 (*t*, OCH2).

HR-MALDI: 398.1221 (100, C20H17N5NaO3, [M+Na]+ requires 398.1224).

Anal. Calc. for C20H17N5O3 (375.39): C 63.99, H 4.56, N 18.66; found: C 63.94, H 4.76, N 18.57.

*6-benzyloxy-2,4-diamino-4*-N*-(3-pyridoyl)-5-nitrosopyrimidine* **(1i)**

m.p. 188–189° (decomp.)

*R*f (CH2Cl2/MeOH 40/1) 0.11

IR (KBr) 3486*w*, 3298*w*, 3198*w*, 1712*m*, 1632*s*, 1604*s*, 1581*s*, 1552*s*, 1453*s*, 1420*m*, 1402*m*, 1343*s*, 1285*s*, 1259*s*, 1204*m*, 1178*s*, 1158*s*, 1129*s*, 1080*s*, 1021*m*, 916*m*, 814*m*, 792*m*, 729*s*, 715*s*, 698*s*, 666*m*.

1H-NMR (300 MHz, [D6]–DMSO): 13.51 (1H, *s*, NH–C(4)); 9.11 (1H, *dd*, *J* 2.7, 0.9, H–C(2)); 8.92, 8.85 (2H, 2*s,* NH2); 8.86 (1H, *dd*, *J* 5.1, 1.8, H–C(6)); 8.30 (*ddd*, *J* 8.1, 2.7, 1.8, H–C(4)); 7.68 (*ddd*, *J* 8.1, 5.1, 0.9, H–C(5)).

13C-NMR (75 MHz, [D6]–DMSO): 169.6, 164.1, 163.65, 153.2, 135.4 (4*s*, C=O, pyrimidine); 148.6, 135.4, 129.2, 123.9, 124.0 (pyridyl); 139.1 (*s*, Ph); 128.5, 128.3, 128.2 (3*d*, Ph); 68.55 (*t*, OCH2).

HR-MALDI: 373.1017 (21, C17H14N6NaO3, [M+Na]+ requires: 373.1020).

Anal. Calc. for C17H14N6O3 (350.34): C 58.28, H 4.03, N 23.99; found: C 58.38, H 4.19, N 23.91.

*4*-N*-(Benzyl 2,3-di-*O*-isopropylidene*-*-d-ribofuranuroyl)-2,4-diamino-6-benzyloxy-5-nitrosopyrimidine* **(1j)**

m.p. 188–189° (decomp.)

*R*f (Cyclohexane/EtOAc 1/1) 0.45

IR (neat) 3689*w*, 3531*w*, 3412*m*, 3322*w*, 3227*w*, 2991*w*, 2942*w*, 1734*m*, 1620*s*, 1599*s*, 1531*s*, 1464*s*, 1406*m*, 1350*m*, 1261*s*, 1161*m*, 1095*m*, 1081*m*, 1048*m*, 941*w*, 863*m*, 799*w*.

1H-NMR (300 MHz, CDCl3): 12.85 (1H, *s*, NH–C(4)); 7.54–7.51 (2H, *m*); 7.43–7.34 (3H, *m*); 7.13–6.99 (5H, *m*, Ph); 6.64, 5.85 (2H, 2*s*, br., NH2); 5.69, 5.62 (2H, *AB*, *J* 12.6, C(6)–OCH2); 5.41 (1H, *d*, *J* 6.6, H–C(2)); 5.40 (1H, *s*, H–C(1)); 4.67 (1H, s, H–C(4)); 4.66 (1H, obscured *d*, H-C(2)); 4.58 (2H, *s*, C(1)–OCH2Ph); 1.36, 1.52 (6H, 2*s*, CH3).

13C-NMR (75 MHz, [D6]–DMSO): 170.7 (*s*, C=O); 163.9, 135.1, 136.4, 112.9 (4*s*, pyrimidine); 138.9 (*s*, Ph); 128.5, 128.3, 128.0, 127.2, 127.6 (*d*, Ph); 107.8 (*d*, C(1)); 85.7, 84.3, 81.3 (3*d*, C(2–4), 69.6, 69.4 (2*t*, OCH2); 26.6, 25.3 (2*q*, CH3).

HR-MALDI: 373.1017 (21, C17H14N6NaO3, [M+Na]+ requires: 373.1020).

Anal. Calc. for C17H14N6O3 (350.34): C 58.28, H 4.03, N 23.99; found: C 58.38, H 4.19, N 23.91.

*6-Benzyloxy-2,4-diamino-4-*N*-isobutoxycarbonyl-5-nitrosopyrimidine* **(6)**

*R*f (EtOAc) 0.53

1H-NMR (300 MHz, CDCl3): 12.26 (1H, br. *s*, NH–C(4)); 7.54–7.32 (5H, *m*, Ph); 6.63, 5.89 (2H, 2*s*, br., NH2); 5.70 (2H, *s*, OCH2Ph); 3.97 (2H, *d*, *J* 6.6, OC*H*2*i*-Pr); 2.01 (1H, *hept.*, *J* 6.6, CH2C*H*(CH3)2); 0.98 (6H, *d*, *J* 6.6, CH3).

HR-MALDI: 368.1315 (100, C16H19N5NaO4, [M+Na]+ requires: 368.1335).

*2-Amino-6-benzyloxy-8-methylpurine* **(3a)**

m.p. 219–221°

*R*f (EtOAc) 0.02

IR (KBr) 3436*w* (br.), 2961*m*, 2921*m*, 2839*m*, 2723*w*, 1631*w*, 1461*s*, 1377*s*, 1359*m*, 1304*w*, 1256*w*, 1168*m*, 1122*w*, 1103*w*, 998*m*, 973*m*, 899*w*, 842*m*, 809*w*, 731*w*, 695*w.*

1H-NMR (300 MHz, [D6]–DMSO): 12.16 (1H, *s*, H–N(9)); 7.49–7.31 (5H, *m*, Ph); 6.16 (2H, br. *s,* NH2); 5.45 (2H, *s*, OCH2); 2.32 (3H, *s*, CH3).

13C-NMR (75 MHz, [D6]–DMSO): 159.2, 158.8, 156.3, 146.8, 113.4 (5*s*, purine); 136.9 (*s*, Ph); 128.4, 128.3, 128.0 (3*d*, Ph); 66.6 (*t*, OCH2); 14.7 (*q*, CH3).

HR-MALDI: 256.1191 (100, C13H14N5O, [M+H]+ requires: 256.1198).

Anal. calc. for C13H13N5O (255.28): C 61.17, H 5.13, N 27.43; found: C 61.32, H 5.21, N 27.34.

*2-Amino-6-benzyloxy-8-*iso-*propylpurine* **(3b)**

m.p. 193–194°

*R*f CH2Cl2/MeOH 19/1) 0.10

IR (CHCl3) 3530*w*, 3424*w*, 3203*w* (br.), 2972*m*, 1672*w*, 1625*s*, 1594*s*, 1522*w*, 1498*w*, 1470*m*, 1457*m*, 1410*m*, 1356*m*, 1327*w*, 1304*w*, 1262*m*, 1148*w*, 1093*m*, 1049*w*, 1013*w*, 979*w*, 911*w*.

1H-NMR (300 MHz, CDCl3): 10.37 (1H, br. *s*, H–N(9)); 7.49–7.29 (5H, *m*, Ph); 5.54 (2H, *s*, OCH2); 4.82 (2H, br. *s,* NH2); 3.14 (1H, *hept*, *J* 7.2, C*H*(CH3)2); 1.38 (6H, *d*, *J* 7.2, CH3).

13C-NMR (75 MHz, CDCl3): 160.6, 159.8, 159.2, 157.8, 112.2 (5*s*, purine); 137.5 (*s*, Ph); 129.0, 128.6, (*d*, Ph); 68.5 (*t*, OCH2); 30.0 (d, *C*H(CH3)2), 21.3 (*q*, CH3).

HR-MALDI: 284.1512 (100, C15H19N5O, [M+H]+ requires: 284.1511).

*2-Amino-6-benzyloxy-8-*tert*-butylpurine* **(3c)**

*R*f CH2Cl2/MeOH 19/1) 0.32

IR (CHCl3) 3669*w*, 3530*w*, 3457*w*, 3424*m*, 3203*w* (br.), 2969*m*, 2873*w*, 1672*m*, 1622*s*, 1595*s*, 1520*w*, 1478*m*, 1457*m*, 1410*m*, 1357*m*, 1322*m*, 1264*s*, 1170*m*, 1146*w*, 1091*m*, 1049*w*, 1015*w*, 971*w*, 911*w*, 865*w*.

1H-NMR (300 MHz, CDCl3): 9.79 (1H, br. *s*, H–N(9)); 7.49–7.27 (5H, *m*, Ph); 5.55 (2H, *s*, OCH2); 4.81 (2H, br. *s,* NH2); 1.41 (9H, *s*, CH3).

13C-NMR (75 MHz, CDCl3): 162.2, 160.1, 159.8, 157.4, 111.4 (5*s*, purine); 137.3 (*s*, Ph); 129.1, 129.0, 128.8 (3*d*, Ph); 68.9 (*t*, OCH2); 34.5 (d, *C*H(CH3)3), 29.2 (*q*, CH3).

HR-MALDI: 298.1657 (100, C16H20N5O, [M+H]+ requires: 298.1668).

*2-Amino-6-benzyloxy-8-phenylpurine* **(3d)**

m.p. 232–234°

*R*f (Cyclohexane/EtOAc 1/1) 0.05

IR (KBr) 3488*w*, 3314*w*, 3194*w*, 1631*s*, 1583*s*, 1528*w*, 1490*m*, 1466*m*, 1439*m*, 1416*m*, 1354*m*, 1329*w*, 1291*w*, 1259*w*, 1158*m*, 1081*w*, 1054*w*, 1028*w*, 953*w*.

1H-NMR (300 MHz, [D6]–DMSO): 12.93 (1H, br. *s*, H–N(9)); 8.07–7.36 (10H, *m*, Ph); 6.40 (2H, br. *s,* NH2); 5.51 (2H, *s*, OCH2).

13C-NMR (75 MHz, [D6]–DMSO): 159.2, 159.4, 156.4, 146.7, 114.4 (5*s*, purine); 136.5 (*s*, Ph); 129.7, 129.2, 128.6, 128.45, 128.2, 127.9, 125.65 (*d*, Ph); 66.8 (*t*, OCH2).

HR-MALDI: 318.1342 (40, C18H16N5O, [M+H]+ requires: 318.1355).

*2-Amino-6-benzyloxy-8-diphenylmethylpurine* **(3e)** [Contaminated with Ph3PO]

*R*f (EtOAc/Cyclohexane 2/1) 0.1

1H-NMR (300 MHz, CDCl3): 10.36 (1H, br. *s*, H–N(9)); 7.49–7.17 (15H, *m*, Ph); 5.74 (1H, *s*, CH(Ph)2), 5.52 (2H, *s*, OCH2), 4.43 (2H, *s,* NH2).

13C-NMR (75 MHz, CDCl3): 160.4, 157.65, 153.2, 152.7, 113.6 (5*s*, purine); 139.2–127.2 (3*s*, several *d*, Ph); 68.8 (*t*, OCH2); 51.45 (*d*, 1H, *C*H(Ph)2).

HR-MALDI: 408.1817 (100, C25H22N5O, [M+H]+ requires: 408.1824).

*2-Amino-6-benzyloxy-8-stearylpurine* **(3f)**

m.p. 102–103°

*R*f (CH2Cl2/MeOH 20/1) 0.26

IR (KBr) 3487*w*, 3315*w*, 3193*w*, 2916*s*, 2849*s*, 1633*s*, 1589*s*, 1574*s*, 1532*m*, 1466*s*, 1405*s*, 1351*s*, 1253*m*, 1153*m*, 1094*m*, 993*w*, 844*w*, 791*m*, 731*s*, 719*s*, 696*s.*

1H-NMR (300 MHz, CDCl3): 13.02 (1H, *s*, H–N(9)); 7.33–7.22 (5H, *m*, Ph); 5.45 (2H, *s*, OCH2); 5.11 (2H, *s,* NH2); 2.70 (2H, *t*, *J* 7.5, H–C(1)); 1.68 (2H, *m*, H–C(2)); 1.32–1.15 (28H, *m*, 14CH2); 0.87 (3H, *t*, *J* 7.2, CH3).

13C-NMR (75 MHz, CDCl3): 159.7, 158.4, 155.2, 152.35, 114.7 (5*s*, purine); 136.15 (*s*, Ph); 128.2, 128.0, 127.8 (3*d*, Ph); 68.0 (*t*, OCH2); 32.0 (*t*, C(1)); 29.8–22.8 (several *t*, C(3–16)); 14.2 (*q*, CH3).

HR-MALDI: 480.3689 (100, C29H46N5O, [M+H]+ requires: 480.3697).

Anal. Calc. for C29H45N5O (479.71): C 72.61, H 9.45, N 14.60; found: C 72.82, H 9.38, N 14.45.

*2-Amino-6-benzyloxy-8-(2**-furyl)purine* **(3g)**

m.p. 236–237° (decomp.)

*R*f (CH2Cl2/MeOH 20/1) 0.24

IR (KBr) 3481*m*, 3407*m*, 3321*m*, 1638*s*, 1607*s*, 1579*s*, 1521*w*, 1493*s*, 1408*m*, 1354*m*, 1322*m*, 1267*m*, 1155*m*, 1082*w*, 966*w*, 901*w*, 790*w*, 732*m*, 699*w*.

1H-NMR (300 MHz, [D6]–DMSO): 12.93 (1H, br. *s*, H–N(9)); 7.83 (1H, *s,* H–C(5)); 7.52–7.32 (5H, *m*, Ph); 7.05 (1H, *d*, *J* 2.7, H–C(3)); 6.66 (1H, br*. s*, H–C(4)); 6.40 (2H, br. s, NH2); 5.47 (2H, *s*, OCH2).

13C-NMR (75 MHz, [D6]–DMSO): 159.5, 159.4, 155.7, 139.35, 114.1 (5*s*, purine); 145.0, 144.0, 112.0, 109.5 (furyl); 136.4 (*s*, Ph); 128.3, 128.2, 127.85 (3*d*, Ph); 66.7 (*t*, OCH2).

HR-MALDI: 308.1135 (100, C16H14N5O2, [M+H]+ requires: 308.1142).

Anal. Calc. for C16H13N5O2 (307.31): C 62.53, H 4.26, N 22.79; found: C 62.36, H 4.42, N 22.65.

*2-Amino-6-benzyloxy-8-(2-styryl)purine* **(3h)**

m.p. 248° (decomp.)

*R*f (CH2Cl2/MeOH 20/1) 0.28

IR (KBr) 3446*m*, 3406*m* (br.), 1647*m*, 1615*s*, 1588*s*, 1477*m*, 1452*m*, 1400*m*, 1353*w*, 1332*m*, 1268*m*, 1157*m*, 1104*w*, 964*w*, 845*w*, 793*w*, 756*w*, 699*w*, 675*w*.

1H-NMR (300 MHz, [D6]–DMSO): 12.63 (1H, *s*, H–N(9)); 7.59–7.31 (11H, *m*, 2Ph, vinyl); 7.02 (1H, *d*, *J* 16.8, vinyl); 6.42 (2H, *s*, NH2); 5.47 (2H, *s*, OCH2).

13C-NMR (75 MHz, [D6]–DMSO): 159.3, 155.4, 146.7, 133.15, 114.4 (5s, purine); 136.3, 135.3 (2*s*, Ph); 128.8, 128.2, 128.1, 127.9 (*d*, Ph); 126.6, 116.9 (2*d*, CH=CH); 66.7 (*t*, OCH2).

HR-MALDI: 344.1502 (100, C20H18N5O, [M+H]+ requires: 344.1506).

Anal. Calc. for C20H17N5O (343.39): C 69.96, H 4.99, N 20.39; found: C 70.08, H 5.09, N 20.44.

*2-Amino-6-benzyloxy-8-(3**-pyridyl)purine* **(3i)**

m.p. 250° (decomp.)

*R*f (CH2Cl2/MeOH 20/1) 0.18

IR (KBr) 3475*m*, 3329*m*, 3191*w*, 2878*w*, 1611*s*, 1575*s*, 1521*s*, 1489*m*, 1460*m*, 1446*m*, 1408*s*, 1356*s*, 1319*m*, 1268*s*, 1158*s*, 1062*m*, 1025*m*, 941*s*, 913*m*, 846*m*, 788*m*, 756*s*, 736*s*, 697*s*, 681*m*.

1H-NMR (300 MHz, [D6]–DMSO): 13.13 (1H, *s*, H–N(9)); 9.22(1H, *s*, H–C(2)); 8.60 (1H, *d*, *J* 3.3, H–C(6)); 8.38 (1H, *d*, *J* 8.1, H–C(4)); 7.55–7.36 (6H, *m*, Ph, H–C(5)); 6.49 (2H, *s*, NH2); 5.51 (2H, *s*, OCH2).

13C-NMR (75 MHz, [D6]–DMSO): 159.5, 156.1, 154.3, 144.2, 114.55 (5*s*, purine); 149.8, 146.6, 133.0, 125.7, 123.8 (pyridyl); 136.3 (*s*, Ph); 128.5, 128.3, 128.0 (3*d*, Ph); 66.9 (*t*, OCH2).

HR-MALDI: 319.1305 (100, C17H15N6O, [M+H]+ requires: 319.1302).

*2-Amino-8-(benzyl 2,3-di-*O*-isopropylidene--d-threofuranos-4-yl)-6-benzyloxypurine* **(3j)**

*R*f (Cyclohexane/EtOAc 1/1) 0.27

[]D: –55.5 (*c* 0.9)

IR (neat) 3502*w*, 3361*w*, 3065*w*, 3033*w*, 2988*w*, 2938*w*, 2872*w*, 2795*w*, 1630*m*, 1583*s*, 1524*w*, 1480*m*, 1468*m*, 1416*m*, 1374*w*, 1352*m*, 1319*m*, 1258*m*, 1208*m*, 1159*m*, 1077*s*, 1055*m*, 1039*m*, 1008*m*, 957*m*, 908*m*, 862*m*, 841*m*, 818*m*, 790*m*, 768*m*, 726*s*, 695*s*, 646*m*.

1H-NMR (300 MHz, [D6]–DMSO): 14.49 (1H, br. *s*, H–N(9)); 7.56–7.53 (2H, *m*), 6.76–6.73 (2H, *m*), 6.93–6.91 (3H, *m*), 7.40–7.32 (3H, *m*, Ph); 6.03 (1H, *d*, *J* 6.3, H-C(3)); 5.89 (2H, br. *s*, NH2); 5.67, 5.61 (2H, *AB*, *J* 12.3, C(6)–OC*H*2Ph); 5.47 (1H, *s*, H-C(1)); 5.27 (1H, *s*, H-C(4)); 4.72 (1H, *d*, *J* 6.3, H-C(2)); 4.29 (2H, s, C(1)–OC*H*2Ph); 1.51, 1.35 (6H, 2*s*, CH3).

13C-NMR (75 MHz, [D6]–DMSO): 160.8, 158.7, 155.9, 149.1, 114.8 (5*s*, purine); 136.4, 136.0 (2*s*, Ph); 128.5, 128.3, 128.0, 127.7, 127.6 (*d*, Ph); 112.3 (s, *C*(CH3)2); 107.4 (*d*, C(1); 84.9, 81.85, 81.8 (3*d*, C(2–4), 68.9, 68.2 (2*t*, CH2Ph); 26.3, 24.6 (2*q*, CH3).

HR-MALDI: 512.1919 (12, C26H28N5O5, [M+H]+ requires: 512.1910).

*8-Methylguanine hydroformate salt* **(7a)**

*R*f (CH2Cl2/MeOH 4/1) 0.13

IR (KBr) 3334*s*, 3138*s* (br), 2908*s* (br), 1685*s*, 1555*s*, 1506*m*, 1389*s*, 1356*s*, 1277*w*, 1216*w*, 1172*w*, 1121*w*, 1038*w*, 1012*w*, 868*m*, 780*m*.

1H-NMR (300 MHz, [D6]–DMSO): 10.48 (2H, br. *s*, H–N(1), H–N(9)); 8.21 (1H, br. *s*, HCO2-); 6.16 (2H, br. *s*, NH2); 2.26 (*s*, 3H, CH3).

13C-NMR (75 MHz, DCO2D): 165.5 (*t*, D*C*O2-); 154.3, 153.6, 148.8, 148.7, 106.3 (5 *s*, guanyl); 11.2 (*q*, CH3).

ESI-MS: 166 (100, [M+H]+).

*8-*Iso*-propylguanine hydroformate salt* **(7b)**

*R*f (CH2Cl2/MeOH 9/1) 0.22

IR (KBr) 3146*s* (br.), 2108*w*, 1682*s*, 1621*s* (br), 1502*m*, 1401*s*, 1372*s*, 1246*w*, 1164*w*, 1115*w*, 1093*w*, 987*w*, 893*w*, 858*w*, 780*w*.

1H-NMR (300 MHz, [D6]–DMSO): 12.03 (1H, br. *s*, H–N(1); 10.48 (1H, *br*. s, H–N(9)); 8.23 (1H, br. *s*, HCO2-); 6.20 (2H, br. *s*, NH2); 2.91 (1H, *hept*. *J* 6.9 C*H* (CH3)2); 1.23 (6H, *d*, *J* 6.9 CH3).

13C-NMR (100 MHz, DCO2D): 164.9 (*t*, D*C*O2-); 156.0, 154.0, 153.3, 148.7, 105.9 (5*s*, guanyl); 26.5 (*d*, *C*H(CH3)2); 18.1 (*q*, CH3).

ESI-MS: 194 (100, [M+H]+).

*8-*tert*-Butylguanine hydroformate salt* **(7c)**

*R*f (CH2Cl2/MeOH 9/1) 0.31

IR (KBr) 3152*m* (br.), 2971*m*, 1688*s*, 1540*m*, 1500*m*, 1466*m*, 1408*m*, 1374*m*, 1285*w*, 1214*m*, 1145*w*, 1056*w*, 983*w*, 869*w*, 823*w*.

1H-NMR (300 MHz, [D6]–DMSO): 12.05 (1H, br. *s*, H–N(1); 10.43 (1H, br. *s*, H–N(9)); 8.19 (1H, br. *s*, HCO2-); 6.19 (2H, br. *s*, NH2); 1.28 (9H, *s,* CH3).

13C-NMR (100 MHz, DCO2D): 164.9 (*t*, D*C*O2-); 158.3, 154.0, 153.3, 148.9, 105.9 (5*s*, guanyl); 32.8 (*s*, *C*H(CH3)2); 26.3 (*q*, CH3).

*8-Phenylguanine hydroformate salt* **(7d)**

*R*f (CH2Cl2/MeOH 9/1) 0.50

IR (KBr) 3335*m* (br.), 3153*m* (br.), 1690*s*, 1461*m*, 1352*m*, 1237*w*, 1164*w*, 1117*w*, 1027*w*, 966*w*, 866*w*, 774*w*, 711*m*, 689*m*.

1H-NMR (300 MHz, [D6]–DMSO): 12.79 (1H, br. *s*, H–N(1); 10.65 (1H, *br*. s, H–N(9)); 8.21 (1H, br. *s*, HCO2-); 8.02–7.39 (5H, *m*, Ph); 6.38 (2H, br. *s*, NH2).

13C-NMR (100 MHz, [D6]–DMSO + 3 drops CD3CO2D): 172.5 (*t*, CD3*C*O2-); 156.7, 153.8, 145.7, 117.6 (*s*, guanyl); 130.5, 129.45, 129.2, 126.0 (4*d*, *s*, Ph), 20.7 (*hept*. *C*D3CO2-).

HR-MALDI: 228.0879 (100, C11H11N5O, [M+H]+ requires: 288.0885).

*8-Diphenylmethylguanine hydroformate salt* **(7e)**

*R*f (CH2Cl2/MeOH 9/1) 0.31

IR (KBr) 3314*m*, 3140*m* (br), 2925*m*, 1680*s*, 1631*s* (br), 1494*m*, 1452*m*, 1364*m*, 1227*w*, 1155*w*, 1031*w*, 1012*w*, 882*w*.

1H-NMR (300 MHz, [D6]–DMSO): 12.28 (1H, br. *s*, H–N(1); 10.61 (1H, *br*. s, H–N(9)); 8.42 (1H, br. *s*, HCO2-); 7.31–7.19 (10H, *m*, Ph); 6.36 (2H, br. *s*, NH2); 5.47 (1H, s, C*H*(Ph)2).

13C-NMR (100 MHz, DCO2D): 164.9 (*t*, DCO2-); 153.5, 152.9, 152.6, 148.4, 106.8 (5*s*, guanyl); 135.5 (s, Ph), 128.5, 127.9, 127.8 (3*d*, Ph); 48.7 (*d*, *C*HPh2).

ESI-MS: 318 (28, [M+H]+).

*8-Stearylguanine* **(7f)**

m.p. 280°(decomp.)

*R*f (CH2Cl2/MeOH/NH3·H2O 5/1/0.2) 0.79

IR (KBr) 3361*m* (br.), 3182*m*(br.), 2918*s*, 2850*s*, 1683*s*, 1551*w*, 1497*w*, 1468*w*, 1403*w*, 1368*w*, 1228*w*, 870*w*, 778*w*, 722*w*,

1H-NMR (300 MHz, [D6]–DMSO): 11.98 (1H, *s*, H–N(1)); 10.36 (1H, *s*, H–N(9)); 6.19, 6.01 (2H, 2*s*, NH2); 2.60 (2H, *t*, *J* 7.5, H–C(1)); 1.62 (2H, *m*, H–C(2)); 1.23 (28H, *m*, 14CH2); 0.85 (3H, *t*, *J* 6.9, CH3).

13C-NMR (100 MHz, DCO2D): 154.0, 153.2, 151.7, 148.6, 106.0 (5*s*, guanyl); 30.6 (*t*, C(1)); 30.4 (*t*, C(2)); 28.3–12.5 (several *t*, C(3–16)); 12.4 (*q*, CH3).

HR-MALDI: 390.3230 (100, C22H40N5O, [M+H]+ requires: 390.3227).

*8-(2**-Furyl)guanine* **(7g)**

m.p. 290 °(decomp.)

*R*f (CH2Cl2/MeOH/NH3·H2O 5/1/0.2) 0.14

IR (KBr) 3466*s* (br.), 3127*m*(br.), 1683*s*, 1508*w*, 1382*w*, 1357*w*, 1222*w*, 1173*w*, 1099*w*, 973*w*, 904*w*, 884*w*, 775*w*, 734*w*, 701*w*.

1H-NMR (300 MHz, [D6]–DMSO): 11.38 (2H, br. *s,* H–N(1), H–N(9)); 7.81(1H, *d*, *J* 1.5, H–C(5)); 6.99 (1H, *d*, *J* 3.3, H–C(3)); 6.64 (1H, *dd*, *J* 3.3, 1.5, H–C(4)); 6.36 (2H, br. s, NH2).

13C-NMR (75 MHz, [D6]–DMSO): 155.9, 154.2, 153.0, 138.9, 114.8 (5*s*, guanyl); 144.8, 143.7, 111.9, 109.1 (furyl).

HR-MALDI: 218.0676 (100, C9H8N5O2, [M+H]+ requires: 218.0673).

*8-Phenethylguanine* **(7h)**

m.p. 310° (decomp.)

*R*f (CH2Cl2/MeOH/NH3·H2O 5/1/0.2) 0.26

IR (KBr) 3315*s* (br.), 3129*s* (br.), 2924*m*, 2755*m*, 1682*s*, 1508*m*, 1421*m*, 1395*m*, 1357*m*, 1265*w*, 1222*m*, 1176*w*, 1124*w*, 974*w*, 905*w*, 884*w*, 861*w*, 776*m*, 748*w*, 700*w*.

1H-NMR (300 MHz, [D6]–DMSO): 12.12 (1H, br. *s*, H–N(1)); 10.36 (1H, br. *s*, H–N(9)); 7.29–7.14 (5H, *m*, Ph); 6.07 (2H, *s,* NH2); 3.01–2.87 (4H, *m*, CH2CH2).

13C-NMR (100 MHz, DCO2D): 153.9, 153.15, 150.6, 148.4, 106.05 (5s, guanyl); 137.3 (*s*, Ph), 127.9, 127.3, 126.1 (3*d*, Ph); 31.5, 27.3 (2*t*, CH2CH2).

HR-MALDI: 256.1196 (100, C13H14N5O, [M+H]+ requires: 256.1193).

*8-(3**-Pyridyl)guanine* **(7i)**

m.p. 290° (decomp.)

*R*f (CH2Cl2/MeOH/NH3·H2O 5/1/0.2) 0.09

IR (KBr) 3301*w* (br.), 3156*m* (br.), 2690*w* (br.), 1675*s*, 1628*m*, 1568*m*, 1469*m*, 1392*m*, 1358*m*, 1282*w*, 1234*w*, 1192*w*, 1123*w*, 1025*w*, 964*w*, 866*m*, 811*m*, 773*s*, 697*s*.

1H-NMR (300 MHz, [D6]–DMSO): 12.84 (1H, br. *s*, H–N(1)); 10.65 (1H, br. *s*. H–N(9)); 9.17 (1H, *s*, H–C(2)); 8.57 (1H, *d*, *J* 4.5, H–C(6)); 8.31 (1H, br. *d*, *J* 7.9, H–C(4)); 7.50 (1H, *dd*, *J* 7.9, 4.5, H–C(5)); 6.42 (2H, br. *s*, NH2).

13C-NMR (125 MHz, [D6]–DMSO): 156.65, 155.0, 153.8, 143.5, 117.35 (5*s*, guanyl); 150.0, 146.9, 133.3, 126.3, 124.35 (pyridyl).

HR-MALDI: 229.0829 (100, C10H9N6O, [M+H]+ requires: 229.0832).

*8-(Benzyl 2,3-di-*O*-isopropylidene--d-threofuranos-4-yl)guanine)* **(7j)**

m.p. 263–268° (decomp.)

*R*f (CH2Cl2/MeOH/ 9/1) 0.21

IR (neat) 3344*s* (br.), 3211*s* (br.), 2988*m*, 2938*m*, 2799*m*, 1686*s*, 1636*s*, 1508*m*, 1454*m*, 1375*s*, 1272*m*, 1212*m*, 1159*m*, 1090*s*, 1013*m*, 963*m*, 920*m*, 864*m*, 782*m*, 699*m*, 664*m*, 637*m*, 606*m*.

1H-NMR (300 MHz, [D6]–DMSO): 12.49 (1H, br. *s*, H–N(1)); 10.46 (1H, br. *s*, H–N(9)); 7.18–7.10 (3H, *m*), 6.92–6.89 (2H, *d*, *J* 6.9, Ph); 6.30 (2H, br. *s*, NH2); 5.68 (1H, *d*, *J* 6.0, H–C(3)); 5.20 (2H, *s*, H–C(1), H–C(4)); 4.67 (1H, *d*, *J* 6.0, H–C(2)); 4.30, 4.48 (2H, *AB*, *J* 10.8, CH2Ph); 1.44, 1.32 (6H, 2*s*, CH3).

13C-NMR (125 MHz, [D6]–DMSO): 156.5, 153.2 (2C), 145.5, 115.4 (5*s*, guanyl); 136.8 (s, Ph), 127.8, 127.7, 127.3 (3d, Ph); 111.4 (*s*, *C*(CH3)2); 107.2 (*d*, C(1); 84.7, 81.3, 80.5 (3d, C(2–4); 68.2 (*t*, CH2Ph); 26.2, 24.6 (2*q*, CH3).

HR-MALDI: 422.1442 (75, C19H21N5NaO5, [M+Na]+ requires: 422.1440).
